# Supplementary material for: Tendon proper- and peritenon-derived progenitor cells have unique tenogenic properties
Source: PubMed Central journal article supplement (PMC4230637; doi:10.1186/scrt475), 2014-07-08
Supplement: scrt475-S1.pdf [file scrt475-S1.pdf]

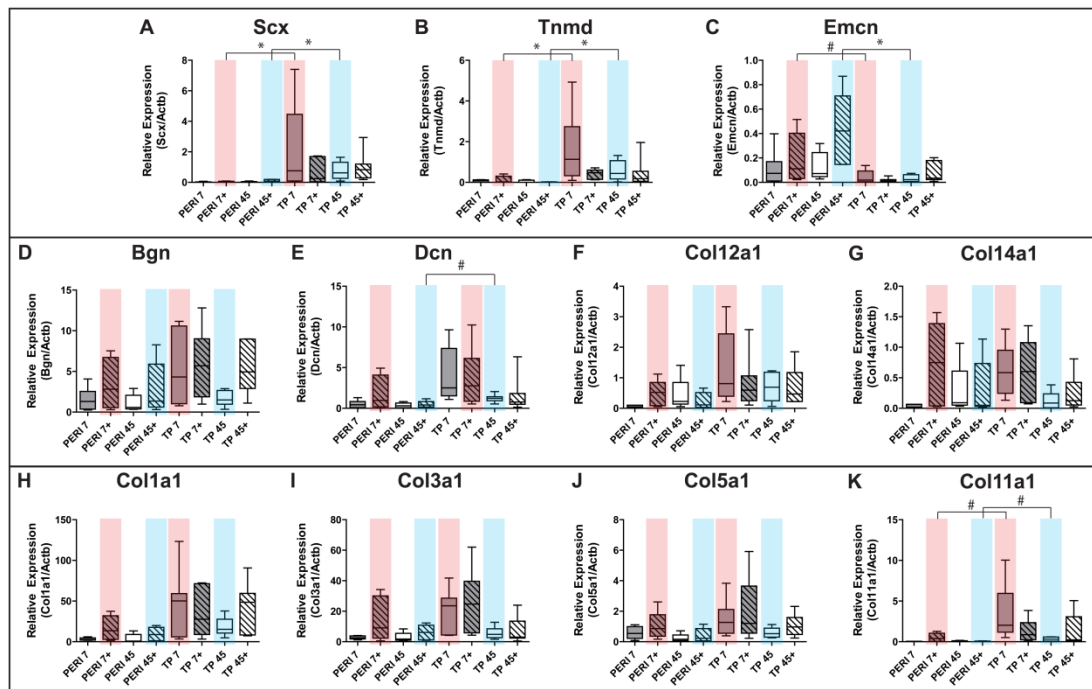

Differentiation Markers

Fibril/Fiber Assembly Regulatory Genes

Fibrillar Collagen Genes
